# Supplementary material for: Single Seed Identification in Three Medicago Species via Multispectral Imaging Combined with Stacking Ensemble Learning
Source: MDPI journal article supplement (doi:10.3390/s22197521), 2022-10-04
Supplement: s1 [file s1]

**Table S1.** List of the extracted variables from multispectral images.

| Name                   | Feature        | Description                                                                                                                                                                                               |
|------------------------|----------------|-----------------------------------------------------------------------------------------------------------------------------------------------------------------------------------------------------------|
| Area(mm <sup>2</sup> ) | Binary Feature | Area of blob.                                                                                                                                                                                             |
| Length(mm)             | Binary Feature | Length of blob bounding box.                                                                                                                                                                              |
| Width(mm)              | Binary Feature | Width of blob bounding box.                                                                                                                                                                               |
| Width/Length Ratio     | Shape Feature  | Ratio of width to length of the image oriented bounding box.                                                                                                                                              |
| Compactness Circle     | Shape Feature  | Compactness of blob defined as $4 \cdot \text{Area} / (\pi \cdot \text{length}^2)$ , ratio of object area to the area of a circle with the same length (isolength quotient).                              |
| Compactness Ellipse    | Shape feature  | Compactness of blob defined as $4 \cdot \text{Area} / (\pi \cdot \text{length} \cdot \text{width})$ , ratio of object area to the area of an ellipse with the same length and width (isolength quotient). |
| BetaShape a            | Shape Feature  | Parameter a of beta-ellipse fitted to blob mask. Parameter a corresponds to width of most pointed blob-end.                                                                                               |
| BetaShape b            | Shape Feature  | Parameter b of beta-ellipse fitted to blob mask. Parameter b corresponds to width of least pointed blob-end.                                                                                              |
| Vertical orientation   | Shape Feature  | Skewness around the horizontal central axis.                                                                                                                                                              |
| Vertical skewness      | Shape Feature  | Vertical anisotropy index of characteristics.                                                                                                                                                             |
| CIELab L*              | Color Feature  | Mean Luminance component of CIELab-color of blob.                                                                                                                                                         |
| CIELab A*              | Color Feature  | Mean A-component of CIELab-color of blob.                                                                                                                                                                 |
| CIELab B*              | Color Feature  | Mean B-component of CIELab-color of blob.                                                                                                                                                                 |
| Saturation             | Color Feature  | Mean saturation of blob based on CIELab coordinates according to formulae: $S = \text{SQRT}(A^2 + B^2)$ .                                                                                                 |
| Hue                    | Color Feature  | Mean hue of blob based on CIELab coordinates according to formulae: $H = \text{ATAN}(B/A)$ .                                                                                                              |

**Table S2.** Mean spectral reflectance of alfalfa, hybrid alfalfa and sickle alfalfa.

| Wavelength (nm) | Spectral reflectance (%) |                 |                  |
|-----------------|--------------------------|-----------------|------------------|
|                 | <i>M. falcata</i>        | <i>M. varia</i> | <i>M. sativa</i> |
| 365             | 8.08a                    | 7.1b            | 7.07b            |
| 405             | 8.59a                    | 7.66b           | 7.61b            |
| 430             | 8.99a                    | 8.01b           | 8.08b            |
| 450             | 10.58a                   | 9.35c           | 9.88b            |
| 470             | 11.53a                   | 10.32c          | 11.08b           |
| 490             | 12.18a                   | 11.07b          | 11.88a           |
| 515             | 13.45a                   | 12.46b          | 13.36a           |
| 540             | 13.87a                   | 12.87b          | 13.76a           |
| 570             | 16.14b                   | 15.05c          | 16.61a           |
| 590             | 17.72a                   | 16.67b          | 18.2a            |
| 630             | 20.36a                   | 19.07b          | 20.53a           |
| 645             | 21.35a                   | 19.9b           | 21.34a           |
| 660             | 22.09a                   | 20.27b          | 21.97a           |
| 690             | 25.03a                   | 23.37b          | 25.01a           |
| 780             | 32.04b                   | 31.53b          | 33.04a           |
| 850             | 41.21b                   | 41.28b          | 43.01a           |
| 880             | 44.54b                   | 44.74b          | 46.64a           |

|     |        |        |        |
|-----|--------|--------|--------|
| 940 | 51.83c | 52.68b | 55.00a |
| 970 | 53.90c | 55.00b | 57.52a |
